# Supplementary material for: Case report: Widely split P' waves in a patient with focal atrial tachycardia
Source: Front Cardiovasc Med. 2024 Jan 11;10:1303200. doi: 10.3389/fcvm.2023.1303200 (PMC10808459; doi:10.3389/fcvm.2023.1303200)
Supplement: Supplementary file 1 [file Datasheet1.docx]

Case Report: Widely Split P' Waves in a Patient with Focal Atrial Tachycardia

Hao Jiang1, Zhongbao Ruan1, Yin Ren1, Xiangwei Ding1

1Department of Cardiology, The Affiliated Taizhou People’s Hospital of Nanjing Medical University, Taizhou School of Clinical Medicine, Nanjing Medical University, Taizhou 225300, China

*** Correspondence:**Xiangwei Ding, M.D.
dingxw1208@126.com

**Keywords: Focal atrial tachycardia, electrocardiography, electrophysiology, left atrial appendage, P' waves**

**Supplementary Appendix**

This appendix has been provided by the authors to give readers additional information about their work.

**List of Contents**

Page 1: Cover page

Page 2: List of contents

Page 3: Supplemental Figure 1

Page 4: Supplemental Figure 2

**
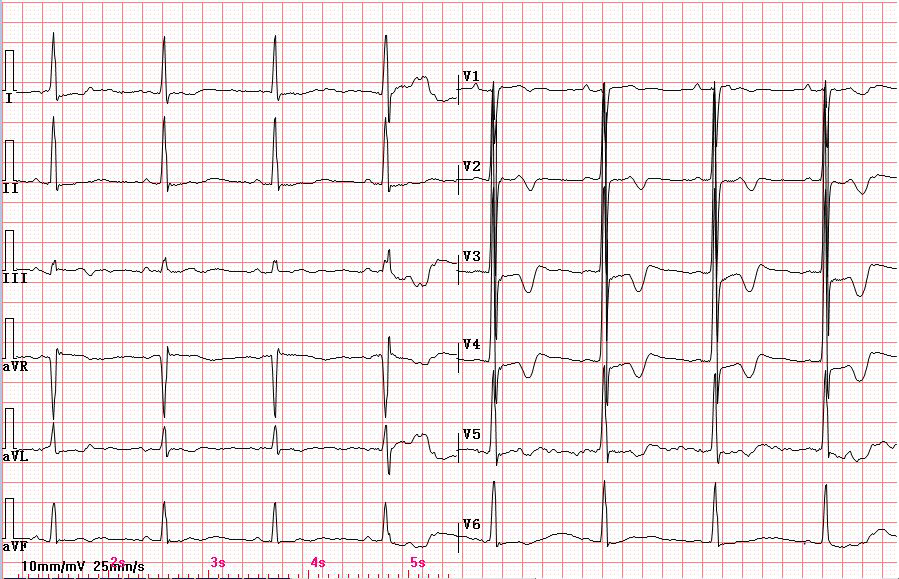
**

**Supplemental Figure 1.** Twelve-lead ECG with sinus rhythm.

**
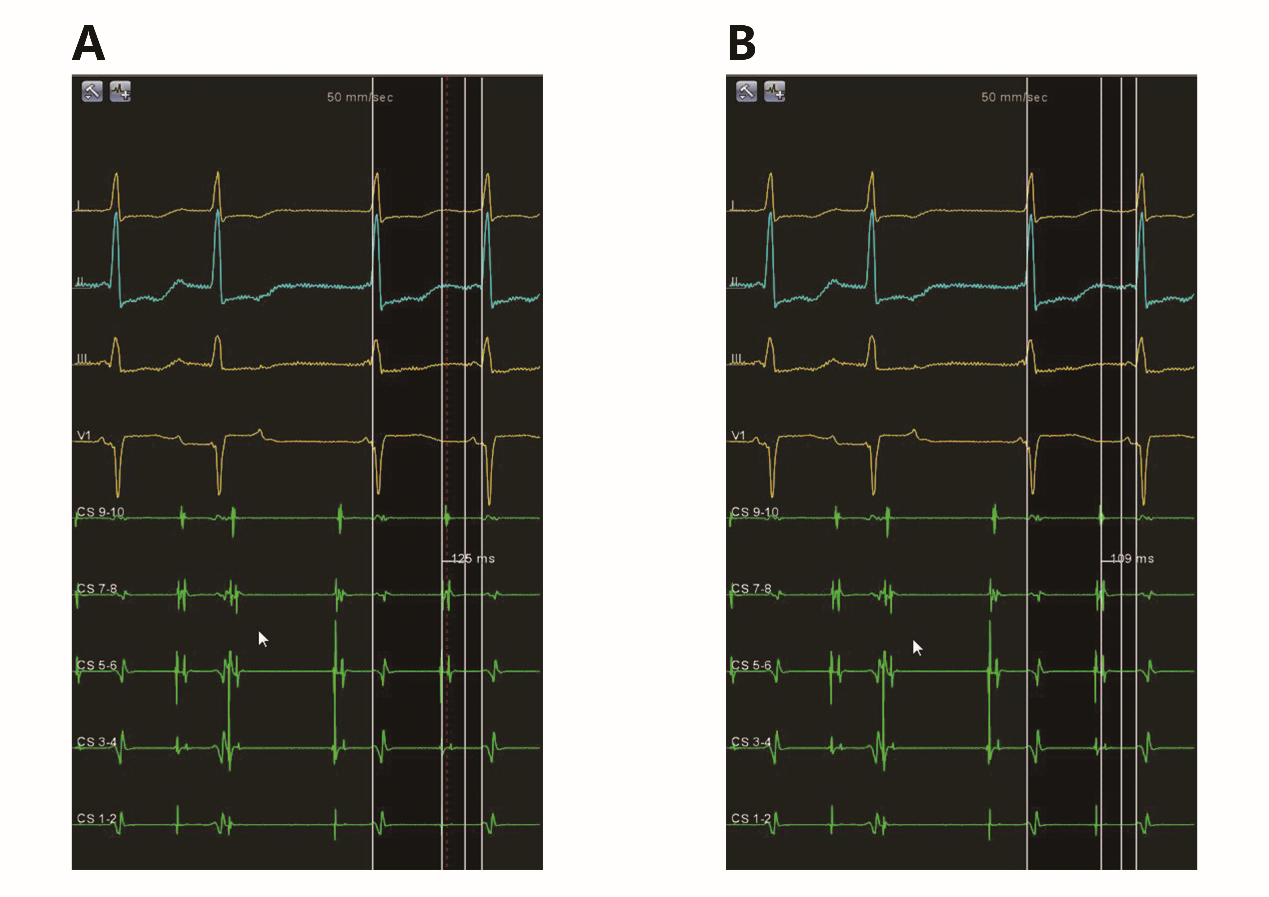
**

**Supplemental Figure 2.** Intracardiac ECG during atrial tachycardia. A: The time interval from CS5-6 to the onset of P'2 wave in surface ECG was 125ms. B: The time interval from CS9-10 to the onset of P'2 wave in surface ECG was 109ms.
